# Supplementary material
Source: MDPI journal article supplement (https://www.mdpi.com/2571-8797/4/4/67)
Supplement: s1 [file s1]

# Effects of MgO and Fe<sub>2</sub>O<sub>3</sub> Addition for Upgrading the Refractory Characteristics of Magnesite Ore Mining Wastes/by-Products

Evangelia Pagona<sup>1</sup>, Kyriaki Kalaitzidou<sup>1</sup>, Vasileios Zaspalis<sup>1</sup>, Anastasios Zouboulis<sup>2,\*</sup>, and Manassis Mitrakas<sup>1</sup>

<sup>1</sup> Department of Chemical Engineering, School of Engineering, Aristotle University of Thessaloniki, Thessaloniki, Greece

<sup>2</sup> Department of Chemistry, School of Sciences, Aristotle University of Thessaloniki, Thessaloniki, Greece

\* Correspondence: zoubouli@chem.auth.gr; Tel.: +302310997794

**Table S1.** The mineralogical content (wt.%) of examined mineral waste sample W12 with the addition of different percentages of MgO and Fe<sub>2</sub>O<sub>3</sub> after their thermal treatment at 1300 °C for 120 min.

| Sample<br>(MgO wt.%)               | Olivine<br>(Forsterite) | Pyroxenes  | Magnesioferrite | Periclase |
|------------------------------------|-------------------------|------------|-----------------|-----------|
| 0%Fe <sub>2</sub> O <sub>3</sub>   |                         |            |                 |           |
| W12                                | 66.5 ± 4.6              | 33.5 ± 2.4 | --              | --        |
| W12 (5%)                           | 84.2 ± 5.6              | 7.7 ± 0.9  | 8.1 ± 0.6       | --        |
| W12 (10%)                          | 90.3 ± 6.4              | --         | 8.6 ± 0.6       | 1.1       |
| W12 (15%)                          | 85.2 ± 5.7              | --         | 8.2 ± 0.6       | 6.6 ± 0.6 |
| 0.5%Fe <sub>2</sub> O <sub>3</sub> |                         |            |                 |           |
| W12 (10%)                          | 90.4 ± 6.2              | --         | 8.4 ± 0.6       | 1.2 ± 0.1 |
| W12 (15%)                          | 85.2 ± 5.7              | --         | 9.0 ± 0.6       | 5.8 ± 0.6 |
| 1%Fe <sub>2</sub> O <sub>3</sub>   |                         |            |                 |           |
| W12(10%)                           | 88.1 ± 6.0              | --         | 8.8 ± 0.6       | 2.4 ± 0.3 |
| W12(15%)                           | 85.4 ± 5.7              | --         | 9.1 ± 0.6       | 5.4 ± 0.6 |
| 2.5%Fe <sub>2</sub> O <sub>3</sub> |                         |            |                 |           |
| W12 (10%)                          | 90.2 ± 6.2              | --         | 9.8 ± 0.7       | --        |
| W12 (15%)                          | 83.5 ± 5.5              | --         | 10.8 ± 0.7      | 5.6 ± 0.6 |
| 5%Fe <sub>2</sub> O <sub>3</sub>   |                         |            |                 |           |
| W12 (10%)                          | 86.9 ± 5.9              | -          | 13.1 ± 0.9      | --        |
| W12 (15%)                          | 82.2 ± 5.5              |            | 13.0 ± 0.9      | 4.8 ± 0.7 |

**Table S2.** The mineralogical content (wt.%) of examined mineral waste sample W13 with different percentages of MgO and Fe<sub>2</sub>O<sub>3</sub> after their thermal treatment at 1300 °C for 120 min.

| Sample<br>(MgO wt.%)               | Olivine<br>(Forsterite) | Pyroxenes<br>(Enstatite/<br>Clinoenstatite) | Magnesioferrite | Periclase |
|------------------------------------|-------------------------|---------------------------------------------|-----------------|-----------|
| 0%Fe <sub>2</sub> O <sub>3</sub>   |                         |                                             |                 |           |
| W13                                | 60.3 ± 3.9              | 39.7 ± 3.9                                  | --              | --        |
| W13 (5%)                           | 74.8 ± 4.9              | 15.8 ± 1.4                                  | 9.4 ± 0.7       | --        |
| W13 (10%)                          | 86.2 ± 5.8              | 6.7 ± 0.6                                   | 7.1 ± 0.6       | --        |
| W13 (15%)                          | 90.2 ± 6.2              | --                                          | 7.7 ± 0.6       | 2.1 ± 0.4 |
| 0.5%Fe <sub>2</sub> O <sub>3</sub> |                         |                                             |                 |           |
| W13 (10%)                          | 81.8 ± 5.4              | 8.5 ± 0.9                                   | 9.7 ± 0.7       | --        |
| W13 (15%)                          | 91.3 ± 6.3              | --                                          | 7.7 ± 0.6       | 0.9 ± 0.2 |
| 1%Fe <sub>2</sub> O <sub>3</sub>   |                         |                                             |                 |           |
| W13(10%)                           | 82.2 ± 5.5              | 9.7 ± 1.1                                   | 8.1 ± 0.6       | --        |
| W13(15%)                           | 89.0 ± 6.1              | --                                          | 8.7 ± 0.6       | 2.4 ± 0.4 |
| 2.5%Fe <sub>2</sub> O <sub>3</sub> |                         |                                             |                 |           |
| W13 (10%)                          | 81.7 ± 5.4              | 8.0 ± 0.9                                   | 10.4 ± 0.7      | --        |
| W13 (15%)                          | 87.9 ± 6.0              | --                                          | 10.1 ± 0.7      | 2.0 ± 0.4 |
| 5%Fe <sub>2</sub> O <sub>3</sub>   |                         |                                             |                 |           |
| W13 (10%)                          | 79.2 ± 5.2              | 8.5 ± 0.9                                   | 12.2 ± 0.8      | --        |
| W13 (15%)                          | 87.3 ± 5.9              | --                                          | 12.7 ± 0.9      | --        |

**Table S3.** The mineralogical content (wt.%) of examined mineral waste sample W12 with the addition of different percentages of MgO and Fe<sub>2</sub>O<sub>3</sub> after their thermal treatment at 1600 °C for 120 min.

| Sample<br>(MgO wt.%)               | Olivine<br>(Forsterite) | Pyroxenes<br>(Clinoenstatite) | Magnesioferrite | Periclase |
|------------------------------------|-------------------------|-------------------------------|-----------------|-----------|
| 0%Fe <sub>2</sub> O <sub>3</sub>   |                         |                               |                 |           |
| W12                                | 87.5 ± 5.9              | 10.3 ± 0.9                    | 2.20 ± 0.2      | --        |
| W12 (5%)                           | 96.6 ± 6.8              | --                            | 3.4 ± 0.3       | --        |
| W12 (10%)                          | 93.3 ± 6.5              | --                            | 6.5 ± 0.5       | --        |
| W12 (15%)                          | 87.3 ± 5.7              | --                            | 7.2 ± 0.5       | 5.5 ± 0.8 |
| W12 (20%)                          | 85.1 ± 5.7              | --                            | 6.7 ± 0.5       | 8.2 ± 0.7 |
| 0.5%Fe <sub>2</sub> O <sub>3</sub> |                         |                               |                 |           |
| W12 (10%)                          | 93.3 ± 6.5              | --                            | 6.7 ± 0.5       | --        |
| W12 (15%)                          | 88.9 ± 6.1              | --                            | 7.1 ± 0.5       | 4.0 ± 1.0 |
| W12 (20%)                          | 83.8 ± 5.6              | --                            | 7.1 ± 0.5       | 9.1 ± 0.7 |
| 1%Fe <sub>2</sub> O <sub>3</sub>   |                         |                               |                 |           |
| W12(10%)                           | 92.3 ± 6.4              | --                            | 7.7 ± 0.6       | --        |
| W12(15%)                           | 88.5 ± 6.0              | --                            | 7.4 ± 0.5       | 4.1 ± 1.0 |
| W12 (20%)                          | 83.9 ± 5.6              | --                            | 7.9 ± 0.6       | 8.2 ± 2.7 |
| 2.5%Fe <sub>2</sub> O <sub>3</sub> |                         |                               |                 |           |
| W12 (10%)                          | 91.3 ± 6.3              | --                            | 8.7 ± 0.6       | --        |
| W12 (15%)                          | 88.2 ± 6.0              | --                            | 7.9 ± 0.6       | 3.9 ± 0.9 |
| W12 (20%)                          | 83.9 ± 5.5              | --                            | 8.8 ± 0.6       | 8.4 ± 0.7 |
| 5%Fe <sub>2</sub> O <sub>3</sub>   |                         |                               |                 |           |
| W12 (10%)                          | 90.0 ± 6.1              | --                            | 10.0 ± 0.7      | --        |
| W12 (15%)                          | 85.8 ± 5.8              | --                            | 9.6 ± 0.7       | 4.7 ± 1.0 |
| W12 (20%)                          | 81.6 ± 5.4              | --                            | 10.2 ± 0.7      | 8.2 ± 0.7 |

**Table S4.** The mineralogical content (wt.%) of examined mineral waste sample W14 with the addition of different percentages of MgO and Fe<sub>2</sub>O<sub>3</sub> after their thermal treatment at 1600 °C for 120 min.

| Sample<br>(MgO wt.%)               | Olivine<br>(Forsterite) | Pyroxenes<br>(Clinoenstatite) | Magnesioferrite | Periclase |
|------------------------------------|-------------------------|-------------------------------|-----------------|-----------|
| 0%Fe <sub>2</sub> O <sub>3</sub>   |                         |                               |                 |           |
| W13                                | 91.3 ± 6.3              | 4.4 ± 0.6                     | 4.3 ± 0.4       | --        |
| W13 (5%)                           | 91.1 ± 6.3              | 6.4 ± 0.7                     | 2.5 ± 0.3       | --        |
| W13 (10%)                          | 95.5 ± 6.8              | --                            | 4.5 ± 0.4       | --        |
| W13 (15%)                          | 94.4 ± 6.6              | --                            | 5.6 ± 0.4       | --        |
| W13 (20%)                          | 89.7 ± 6.1              | --                            | 6.4 ± 0.5       | 3.9 ± 0.4 |
| 1%Fe <sub>2</sub> O <sub>3</sub>   |                         |                               |                 |           |
| W13(10%)                           | 95.0 ± 6.6              | --                            | 5.0 ± 0.5       | --        |
| W13(15%)                           | 93.1 ± 6.5              | --                            | 6.9 ± 0.5       | --        |
| W13 (20%)                          | 88.6 ± 6.0              | --                            | 8.1 ± 0.6       | 3.3 ± 0.4 |
| 2.5%Fe <sub>2</sub> O <sub>3</sub> |                         |                               |                 |           |
| W13 (10%)                          | 95.9 ± 6.7              | --                            | 4.1 ± 0.4       | --        |
| W13 (15%)                          | 93.3 ± 6.5              | --                            | 6.7 ± 0.5       | --        |
| W13 (20%)                          | 89.2 ± 6.1              | --                            | 6.8 ± 0.5       | 4.0 ± 0.5 |
| 5%Fe <sub>2</sub> O <sub>3</sub>   |                         |                               |                 |           |
| W13 (10%)                          | 94.9 ± 6.7              | --                            | 5.1 ± 0.4       | --        |
| W13 (15%)                          | 90.7 ± 6.2              | --                            | 9.3 ± 0.7       | --        |
| W13 (20%)                          | 88.0 ± 6.0              | --                            | 8.5 ± 0.6       | 3.4 ± 0.4 |
